# Supplementary material
Source: Springer Nature journal article supplement (https://www.springermedizin.de/resource/supplementary/13002_2013_458_MOESM1_ESM.pdf/9626846)
Supplement: MOESM1 [file 9626846]

## List of remedies and their applications

Ethnoveterinary herbal remedies used by farmers in four north-eastern Swiss cantons (St. Gallen, Thurgau, Appenzell Innerrhoden and Appenzell Ausserrhoden)

One line in the following table represents one application: [dialogue partner] x [plant species] x [plant part] x [manufacturing process to the finished product] x [category of use] x [specification of use] x [animal species] x [animal age classification] x [administration procedure]. The [specification of use] is not included in the additional file 1 for space reasons. This explains identical lines.

## List of abbreviations

### General:

na= information not available

### Plant part:

bar= bark  
exc= excretions  
flo= flowers and inflorescences  
fsb= fruits, seeds, berries  
her= whole plants without roots (herb)  
lea= leaves  
pet= petals  
rob= root/ bulb  
twb= twigs, branches  
wpr= whole plants with roots

### Origin:

bo= bought/ crude drug  
bo\*= bought/ commercial extracts and finished products  
cu= cultivated  
wh= wild harvesting

vs no: Number of Herbarium voucher

### Extraction procedure on farm:

none  
alcohol: (rt)= room temperature  
(et)= elevated temperature  
milk: (rt)= room temperature  
(et)= elevated temperature  
oil/fat: (rt)= room temperature  
(et)= elevated temperature  
water : (rt)=room temperature  
(dec)=decoction  
(inf)= infusion

### Categories of use:

behav=behaviour  
gastr= gastrointestinal disorders and metabolic dysfunctions  
infer=infertility and diseases of female genitals  
mast= mastitis  
musc= musculoskeletal system  
para=parasites  
resp=respiratory tract diseases  
sens= sensory organ  
skin= skin alterations and sores  
streng= general strengthening  
varia= various indications

### Animal treated:

nsas= no specification of the animal species (external administration)

### Administration

exal= external administration, altered or sore skin  
(epicutan)  
(konj)= konjunktival  
exin= external administration, intact skin  
(epicutan)  
(konj)= konjunktival  
int= internal administration  
(nasal)  
(oral)  
(vaut)= intravaginal/ intrauterine  
tohe= treatment of housing environment

### Daily dosage [g/kg<sup>0.75</sup>]

in plant equivalent per kg metabolic body weight [g/kg<sup>0.75</sup>];  
used in formulations for oral administration only;  
tohe= treatment of housing environment

### Conc [g/100g]

Concentration [g drug in 100g finished product]; used in formulations for topical treatment and intravaginal/ intrauterine administration;  
da= directly administered without extraction, external administration  
tohe= treatment of housing environment

### Ver= Verification of dosage

ew= estimated weight by assesment of the volume and subsequent weighing  
od= original drug weighted on- site  
rd= reference drug weighted on- site

**RN= Recipe number (starts with 202)**

**DP= Dialog partner (starts with 30)**

| Botanical family | Plant species                                                  | Recipe name designated by DP | Plant part   | Origin | Extraction procedure on farm | Categories of use | Animal treated | Administration  | Daily dosage [g/kg0.75] | Conc [g/100g] | Ver  | RN  | DP  |    |
|------------------|----------------------------------------------------------------|------------------------------|--------------|--------|------------------------------|-------------------|----------------|-----------------|-------------------------|---------------|------|-----|-----|----|
| Adoxaceae        | <i>Sambucus nigra</i> L.                                       | Holderstaude                 | twb          | wh     | none                         | gastr             | cattle         | int (oral)      | na                      |               | na   | 705 | 47  |    |
|                  |                                                                | Holderstaude                 |              |        |                              |                   |                |                 | na                      |               | na   | 704 | 46  |    |
|                  |                                                                | Holderstaude                 |              |        |                              |                   |                |                 | na                      |               | na   | 582 | 65  |    |
|                  |                                                                | Holderstaude                 |              |        |                              |                   |                |                 | na                      |               | na   | 264 | 34  |    |
|                  |                                                                | Holundertee                  |              |        |                              | water (inf)       | infer          | cattle          | int (oral)              | 0.02          |      | ew  | 426 | 61 |
| Amaranthaceae    | <i>Beta vulgaris</i> subsp. <i>vulgaris</i> (conditiva- group) | Randenwickel                 | rob          | cu     | none                         | musc              | cattle         | exin (epicutan) |                         | da            | na   | 269 | 35  |    |
| Amaryllidaceae   | <i>Allium cepa</i> L.                                          | Zwiebeln                     | rob          | cu     | none                         | resp              | calf           | int (nasal)     | na                      | na            | na   | 281 | 36  |    |
|                  |                                                                | Zwiebeln                     |              |        |                              | streng            | cattle         | int (oral)      | 1.63                    |               | ew   | 302 | 39  |    |
|                  | <i>Allium sativum</i> L.                                       | Knoblauch                    | rob          | bo     | milk (rt)                    | para              | calf           | int (oral)      | 1.76                    |               | od   | 548 | 73  |    |
|                  |                                                                | Knoblauch                    |              |        | none                         | para              | hen            | int (oral)      | 1.5                     |               | ew   | 318 | 40  |    |
|                  |                                                                | Knoblauch- Wasser            |              |        | water (rt)                   | para              | cattle, calf   | exin (epicutan) |                         | 0.15          | ew   | 610 | 54  |    |
| Apiaceae         | <i>Carum carvi</i> L.                                          | Kümmeltee                    | fsb          | bo     | water (dec)                  | gastr             | calf           | int (oral)      | 3.15                    |               | od   | 675 | 48  |    |
|                  |                                                                | Kümmeltee                    |              |        |                              |                   | cattle         | int (oral)      | 0.14                    |               | rd   | 544 | 73  |    |
|                  |                                                                | Kümmeltee                    |              | wh     | water (inf)                  | gastr             | cattle         | int (oral)      | 0.11                    |               | rd   | 429 | 61  |    |
|                  | <i>Foeniculum vulgare</i> Mill.                                | Fencheltee                   | fsb          | bo     | water (inf)                  | gastr             | calf           | int (oral)      | 0.59                    |               | rd   | 321 | 43  |    |
|                  | <i>Petroselinum crispum</i> (Mill.) Fuss                       | Peterli- Tee                 | her          | cu     | water (inf)                  | infer             | cattle         | int (oral)      | 0.03                    |               | ew   | 342 | 45  |    |
|                  | <i>Sanicula europaea</i> L.                                    | Sarnikel- Tinktur            | her          | wh     | alcohol (rt)                 | skin              | cattle, calf   | exal (epicutan) |                         | 0.01          | od   | 278 | 36  |    |
|                  |                                                                | Sanikel- Tee                 |              |        | water (inf)                  | infer             | cattle         | int (vaut)      |                         | na            | na   | 209 | 30  |    |
|                  |                                                                | Sarnikel- Tee                |              |        |                              | skin              | cattle         | exal (epicutan) |                         | 0.1           | od   | 279 | 36  |    |
| Aquifoliaceae    | <i>Ilex aquifolium</i> L.                                      | Palmentee                    | lea          | wh     | water (dec)                  | resp              | calf           | int (oral)      | 0.01                    |               | ew   | 679 | 48  |    |
|                  |                                                                | Palmentee                    |              |        |                              |                   | cattle         | int (oral)      | 0.01                    |               | ew   | 679 | 48  |    |
|                  |                                                                | Stechpalme                   | twb          | wh     | none                         |                   | para           | calf            | tohe                    | tohe          | tohe | na  | 282 | 36 |
|                  |                                                                | Stechlaub                    |              |        |                              |                   |                |                 | tohe                    | tohe          | tohe | na  | 358 | 46 |
|                  |                                                                | Stechpalme                   |              |        |                              |                   |                |                 | tohe                    | tohe          | tohe | na  | 454 | 66 |
| Aspidiaceae      | <i>Dryopteris filix-mas</i> L. (Schott)                        | Farn                         | her          | wh     | none                         | para              | cattle, calf   | tohe            | tohe                    | tohe          | na   | 364 | 51  |    |
| Asteraceae       | <i>Achillea millefolium</i> L.                                 | Schafgarben- Tee             | flo          | bo     | water (inf)                  | gastr             | calf           | int (oral)      | 0.53                    |               | od   | 701 | 47  |    |
|                  |                                                                | Schafgarben- Tee             |              |        |                              |                   | cattle         | int (oral)      | 0.19                    |               | od   | 701 | 47  |    |
|                  | <i>Arnica chamissonis</i> Less.                                | Arnikatinktur                | flo          | cu     | alcohol (rt)                 | skin              | cattle         | exal (epicutan) |                         | 0.23          | ew   | 569 | 68  |    |
|                  |                                                                | Arnikasalbe                  |              |        | oil/fat (rt)                 | skin              | cattle, calf   | exal (epicutan) |                         | 2             | ew   | 570 | 68  |    |
|                  |                                                                | Arnikasalbe                  |              |        |                              |                   |                |                 |                         | 2             | ew   | 570 | 68  |    |
|                  | <i>Arnica montana</i> L.                                       | Arnikabalsam                 | flo          | bo*    | none                         | musc              | cattle, calf   | exin (epicutan) |                         | na            | na   | 297 | 37  |    |
|                  |                                                                | Arnikaöl                     |              |        |                              |                   |                |                 |                         | na            | na   | 617 | 54  |    |
|                  |                                                                | Arnikaschnaps                |              | wh     | alcohol (rt)                 | musc              | cattle         | exin (epicutan) |                         | 2.33          | ew   | 542 | 73  |    |
|                  |                                                                | Arnikatinktur                |              |        |                              |                   | nsas           | exin (epicutan) |                         | 0.9           | ew   | 638 | 52  |    |
|                  |                                                                | Arnikatinktur                |              |        |                              | skin              | cattle         | exal (epicutan) |                         | 1.14          | ew   | 391 | 57  |    |
|                  |                                                                | Arnikatinktur                |              |        |                              |                   |                |                 |                         | 1.14          | ew   | 391 | 57  |    |
|                  |                                                                | Arnikaschnaps                |              |        |                              |                   | cattle, calf   | exal (epicutan) |                         | 0.91          | ew   | 655 | 51  |    |
|                  |                                                                | Arnikatinktur                |              |        |                              |                   | nsas           | exal (epicutan) |                         | 1.96          | ew   | 341 | 45  |    |
| Arnikatinktur    |                                                                |                              |              |        |                              |                   |                | 1.96            | ew                      | 341           | 45   |     |     |    |
| Arnikasalbe      |                                                                |                              | oil/fat (rt) | musc   | nsas                         | exin (epicutan)   |                | 10              | od                      | 639           | 52   |     |     |    |

| Botanical family | Plant species                   | Recipe name designated by DP | Plant part | Origin | Extraction procedure on farm | Categories of use | Animal treated | Administration  | Daily dosage [g/kg0.75] | Conc [g/100g]   | Ver  | RN  | DP  |    |
|------------------|---------------------------------|------------------------------|------------|--------|------------------------------|-------------------|----------------|-----------------|-------------------------|-----------------|------|-----|-----|----|
| Asteraceae       | <i>Calendula officinalis</i> L. | Ringelblumensalbe            | flo        | bo*    | none                         | skin              | calf           | exin (epicutan) |                         | na              | na   | 597 | 58  |    |
|                  |                                 | Calendulasalbe               |            |        |                              |                   | cattle         | exal (epicutan) |                         | na              | na   | 690 | 46  |    |
|                  |                                 | Calendulasalbe               |            |        |                              |                   |                |                 |                         | na              | na   | 690 | 46  |    |
|                  |                                 | Calendulatinktur             |            |        |                              |                   |                |                 |                         | na              | na   | 691 | 46  |    |
|                  |                                 | Calendulatinktur             |            |        |                              |                   |                |                 |                         | na              | na   | 691 | 46  |    |
|                  |                                 | Ringelblumensalbe            |            |        |                              |                   |                |                 |                         | na              | na   | 410 | 60  |    |
|                  |                                 | Ringelblumensalbe            |            |        |                              |                   |                | nsas            | exal (epicutan)         |                 | na   | na  | 410 | 60 |
|                  |                                 | Ringelblumentinktur          |            | cu     |                              | alcohol (rt)      | infer          | cattle          | int (vaut)              |                 | 2.5  | ew  | 367 | 54 |
|                  |                                 | Calendulatinktur             |            |        |                              |                   | skin           | calf            | exal (epicutan)         |                 | 0.38 | ew  | 672 | 48 |
|                  |                                 | Ringelblumentinktur          |            |        |                              |                   |                |                 |                         |                 | 0.34 | ew  | 219 | 32 |
|                  |                                 | Ringelblumenschnaps          |            |        |                              |                   |                | cattle          | exal (epicutan)         |                 | 0.91 | ew  | 654 | 51 |
|                  |                                 | Ringelblumentinktur          |            |        |                              |                   |                |                 |                         |                 | 0.03 | ew  | 277 | 36 |
|                  |                                 | Ringelblumentinktur          |            |        |                              |                   |                |                 |                         |                 | 0.34 | ew  | 219 | 32 |
|                  |                                 | Ringelblumentinktur          |            |        |                              |                   |                |                 |                         |                 | 0.43 | ew  | 496 | 72 |
|                  |                                 | Calendulatinktur             |            |        |                              |                   |                | cattle, calf    | exal (epicutan)         |                 | 2.33 | ew  | 672 | 48 |
|                  |                                 | Ringelblumenschnaps          |            |        |                              |                   |                |                 |                         |                 | 0.91 | ew  | 654 | 51 |
|                  |                                 | Ringelblumentinktur          |            |        |                              |                   |                |                 |                         |                 | 0.01 | ew  | 367 | 54 |
|                  |                                 | Ringelblumentinktur          |            |        |                              |                   |                |                 |                         |                 | 0.01 | ew  | 367 | 54 |
|                  |                                 | Ringelblumentinktur          |            |        |                              |                   |                |                 |                         |                 | 0.34 | ew  | 219 | 32 |
|                  |                                 | Ringelblumentinktur          |            |        |                              |                   |                |                 |                         | exin (epicutan) | 0.34 | ew  | 219 | 32 |
|                  |                                 | Ringelblumensalbe            |            |        |                              |                   | oil/fat (et)   | skin            | cattle                  | exal (epicutan) | 0.28 | ew  | 220 | 32 |
|                  |                                 | Ringelblumensalbe            |            |        |                              |                   |                |                 | cattle, calf            | exal (epicutan) | 1.82 | od  | 436 | 62 |
|                  |                                 | Ringelblumensalbe            |            |        |                              |                   |                |                 |                         |                 | 0.28 | ew  | 220 | 32 |
|                  |                                 | Ringelblumensalbe            |            |        |                              |                   |                |                 |                         | exin (epicutan) | 0.28 | ew  | 220 | 32 |
|                  |                                 | Ringelblumensalbe            |            |        |                              |                   |                |                 | nsas                    | exal (epicutan) | 3.27 | od  | 274 | 35 |
|                  |                                 | Ringelblumensalbe            |            |        |                              |                   | oil/fat (rt)   | musc            | nsas                    | exin (epicutan) | 1.73 | ew  | 344 | 45 |
|                  |                                 | Ringelblumensalbe            |            |        |                              |                   |                | skin            | cattle                  | exal (epicutan) | 1.82 | od  | 374 | 56 |
|                  |                                 | Ringelblumensalbe            |            |        |                              |                   |                |                 |                         |                 | 1.82 | od  | 374 | 56 |
|                  |                                 | Ringelblumensalbe            |            |        |                              |                   |                |                 |                         |                 | 0.34 | ew  | 276 | 36 |
|                  |                                 | Ringelblumensalbe            |            |        |                              |                   |                |                 |                         |                 | 0.34 | ew  | 276 | 36 |
|                  |                                 | Ringelblumenöl               |            |        |                              |                   |                |                 | cattle, calf            | exal (epicutan) | 2.22 | ew  | 607 | 54 |
|                  |                                 | Ringelblumensalbe            |            |        |                              |                   |                |                 |                         |                 | 1.87 | ew  | 394 | 57 |
|                  |                                 | Ringelblumensalbe            |            |        |                              |                   |                |                 | nsas                    | exal (epicutan) | 0.5  | ew  | 587 | 59 |
|                  |                                 | Ringelblumensalbe            |            |        |                              |                   |                |                 |                         |                 | 1.52 | ew  | 448 | 66 |
|                  |                                 | Ringelblumentee              |            |        |                              |                   | water (inf)    | skin            | nsas                    | exal (epicutan) | 0.1  | ew  | 389 | 59 |
|                  |                                 | Ringelblumensalbe            |            | pet    | cu                           |                   | oil/fat (rt)   | skin            | cattle                  | exal (epicutan) | 1.22 | ew  | 320 | 43 |
|                  |                                 | Ringelblumensalbe            |            |        |                              |                   |                |                 | cattle, calf            | exal (epicutan) | 1.76 | ew  | 563 | 68 |
|                  |                                 | Ringelblumensalbe            |            |        |                              |                   |                |                 |                         |                 | 1.22 | ew  | 320 | 43 |
|                  |                                 | Ringelblumensalbe            |            |        |                              |                   |                |                 | horse                   | exal (epicutan) | 1.22 | ew  | 320 | 43 |
|                  |                                 | Ringelblumentee              |            |        |                              |                   | water (inf)    | gastr           | calf                    | int (oral)      | 0.71 | rd  | 319 | 43 |
| Ringelblumentee  |                                 |                              |            |        |                              | skin              | cattle         | exal (epicutan) | 0.2                     | rd              | 319  | 43  |     |    |
| Ringelblumentee  |                                 |                              |            |        |                              |                   |                |                 | 0.2                     | rd              | 319  | 43  |     |    |
| Ringelblumentee  |                                 |                              |            |        |                              |                   | horse          | exal (epicutan) | 0.2                     | rd              | 319  | 43  |     |    |
| Ringelblumentee  |                                 |                              |            |        |                              |                   | nsas           | exal (epicutan) | 0.2                     | rd              | 319  | 43  |     |    |
| Ringelblumentee  |                                 |                              |            |        |                              |                   | rabbit         | exal (epicutan) | 0.2                     | rd              | 319  | 43  |     |    |

| Botanical family | Plant species                                   | Recipe name designated by DP | Plant part | Origin      | Extraction procedure on farm | Categories of use | Animal treated  | Administration  | Daily dosage [g/kg0.75] | Conc [g/100g] | Ver  | RN  | DP  |    |
|------------------|-------------------------------------------------|------------------------------|------------|-------------|------------------------------|-------------------|-----------------|-----------------|-------------------------|---------------|------|-----|-----|----|
| Asteraceae       | <i>Helianthus annuus</i> L.                     | Speiseöl                     | fsb        | bo          | none                         | mast              | cattle          | exin (epicutan) |                         | na            | na   | 202 | 30  |    |
|                  |                                                 | Speiseöl                     |            |             |                              | para              | cattle, calf    | exin (epicutan) |                         | na            | na   | 202 | 30  |    |
|                  |                                                 | Speiseöl                     |            |             |                              | skin              | cattle, calf    | exin (epicutan) |                         | na            | na   | 202 | 30  |    |
|                  | <i>Matricaria recutita</i> L. (vs no : 71204)   | Kamillentee                  | flo        | bo          | water (inf)                  | gastr             | calf            | int (oral)      | 5.88                    |               | od   | 380 | 56  |    |
|                  |                                                 | Kamillentee                  |            |             |                              |                   |                 |                 | 0.79                    |               | od   | 697 | 47  |    |
|                  |                                                 | Kamillentee                  |            |             |                              |                   |                 |                 | 0.35                    |               | od   | 674 | 48  |    |
|                  |                                                 | Kamillentee                  |            |             |                              |                   |                 |                 | 0.16                    |               | od   | 651 | 51  |    |
|                  |                                                 | Kamillentee                  |            |             |                              |                   |                 |                 | 0.53                    |               | ew   | 535 | 73  |    |
|                  |                                                 | Kamillentee                  |            |             |                              |                   |                 |                 | 0.16                    |               | ew   | 512 | 71  |    |
|                  |                                                 | Kamillentee                  |            |             |                              |                   |                 | cattle          | int (oral)              | 1.94          |      | od  | 380 | 56 |
|                  |                                                 | Kamillenspülung              |            |             |                              |                   | infer           | cattle          | int (vaut)              |               | 0.75 | od  | 652 | 51 |
|                  |                                                 | Kamillenspülung              |            |             |                              |                   |                 |                 |                         |               | 0.3  | ew  | 549 | 73 |
|                  |                                                 | Kamillentee                  |            |             |                              |                   |                 |                 |                         |               | 0.2  | rd  | 206 | 30 |
|                  |                                                 | Kamillentee mit Soda         |            |             |                              |                   |                 |                 |                         |               | 0.9  | od  | 604 | 58 |
|                  |                                                 | Kamillentee                  |            |             |                              |                   | sens            | young goat      | exal (konj)             |               | 0.4  | od  | 495 | 72 |
|                  |                                                 | Schmierseife und Kamillenbad |            |             |                              |                   | skin            | cattle          | exal (epicutan)         |               | 0.04 | od  | 545 | 73 |
|                  |                                                 | Kamillenabsud                |            |             |                              |                   |                 | cattle, calf    | exal (epicutan)         |               | 5    | od  | 381 | 56 |
|                  |                                                 | Kamillentee                  |            |             |                              |                   |                 |                 |                         |               | 0.37 | ew  | 564 | 68 |
|                  |                                                 | Kamillentee                  |            |             |                              |                   |                 | nsas            | exal (epicutan)         |               | 0.4  | od  | 495 | 72 |
|                  |                                                 | Kamillosan®                  |            |             | bo*                          | none              | skin            | calf            | exal (epicutan)         |               | na   | na  | 354 | 46 |
|                  |                                                 | Kamillosan®                  |            |             |                              |                   |                 |                 |                         |               | na   | na  | 257 | 34 |
|                  |                                                 | Kamillencreme                |            |             | cu                           | oil/fat (rt)      | skin            | calf            | exal (epicutan)         |               | 2.12 | ew  | 661 | 50 |
|                  |                                                 | Kamillensalbe                |            |             |                              |                   |                 |                 |                         |               | 5.65 | ew  | 660 | 50 |
|                  |                                                 | Kamillencreme                |            |             |                              |                   |                 | cattle, calf    | exal (epicutan)         |               | 2.12 | ew  | 661 | 50 |
|                  |                                                 | Kamillensalbe                |            |             |                              |                   |                 |                 |                         |               | 5.65 | ew  | 660 | 50 |
|                  |                                                 | Kamillentee                  |            |             |                              |                   | water (inf)     | gastr           | calf                    | int (oral)    | 0.12 | ew  | 397 | 57 |
|                  |                                                 | Kamillentee                  |            |             |                              |                   |                 |                 |                         |               | 2    | rd  | 290 | 37 |
|                  |                                                 | Kamillentee                  |            |             |                              |                   |                 |                 |                         |               | 0.47 | od  | 585 | 65 |
|                  |                                                 | Kamillentee                  |            |             |                              |                   |                 | cattle          | int (oral)              | 0.17          |      | od  | 350 | 45 |
|                  |                                                 | Kamillentee                  |            |             |                              |                   |                 | cattle          | int (vaut)              |               | 0.85 | rd  | 290 | 37 |
|                  |                                                 | Kamillentee                  |            |             |                              |                   | skin            | calf            | exal (epicutan)         |               | 0.18 | od  | 659 | 50 |
|                  |                                                 | Kamillentee                  |            |             |                              |                   |                 | cattle          | exal (epicutan)         |               | 0.85 | rd  | 290 | 37 |
|                  |                                                 | Kamillentee                  |            |             |                              |                   |                 |                 |                         |               | 0.4  | rd  | 445 | 64 |
| Kamillentee      |                                                 |                              | wh         | water (inf) | skin                         | cattle            | exal (epicutan) |                 | 0.23                    | rd            | 428  | 61  |     |    |
| Kamillentee      |                                                 |                              |            |             |                              | nsas              | exal (epicutan) |                 | 0.23                    | rd            | 428  | 61  |     |    |
|                  | <i>Matricaria recutita</i> L. (vs no : 71204)   | Kamillentee                  | na         | bo          | water (inf)                  | gastr             | calf            | int (oral)      | 0.68                    |               | od   | 335 | 44  |    |
|                  |                                                 | Kamillentee                  |            |             |                              |                   |                 |                 | 1.32                    |               | od   | 335 | 44  |    |
|                  | <i>Senecio alpinus</i> (L.) Scop (vs no: 71219) | Alpenkreuzkraut- Tee         | her        | wh          | water (inf)                  | skin              | cattle          | exal (epicutan) |                         | na            | na   | 492 | 67  |    |
|                  |                                                 | Alpenkreuzkraut- Tee         |            |             |                              |                   |                 |                 |                         | na            | na   | 472 | 69  |    |
|                  |                                                 | Buzlentee                    |            |             |                              |                   |                 |                 |                         | na            | na   | 419 | 60  |    |

| Botanical family                           | Plant species                                    | Recipe name designated by DP | Plant part | Origin      | Extraction procedure on farm | Categories of use | Animal treated  | Administration  | Daily dosage [g/kg0.75] | Conc [g/100g]   | Ver  | RN  | DP  |     |    |
|--------------------------------------------|--------------------------------------------------|------------------------------|------------|-------------|------------------------------|-------------------|-----------------|-----------------|-------------------------|-----------------|------|-----|-----|-----|----|
| Asteraceae                                 | <i>Senecio ovatus</i> Willd.                     | Heidnisch Wundkraut          | her        | cu          | water (inf)                  | skin              | nsas            | exal (epicutan) |                         | na              | na   | 640 | 52  |     |    |
|                                            |                                                  | Heidnisch Wundkraut          |            | wh          | water (inf)                  | skin              | cattle, calf    | exal (epicutan) |                         | na              | na   | 425 | 61  |     |    |
|                                            |                                                  | Heidnisch Wundkraut          |            |             |                              |                   |                 |                 |                         |                 | na   | na  | 382 | 56  |    |
|                                            |                                                  | Heidnisch Wundkraut- Tee     |            |             |                              |                   |                 |                 |                         |                 | na   | na  | 680 | 48  |    |
|                                            |                                                  | Heidnisch Wundkraut          |            |             |                              |                   |                 | nsas            | exal (epicutan)         |                 | na   | na  | 425 | 61  |    |
|                                            | <i>Solidago virgaurea</i> L.s.str.               | Heidnisch Wundkraut- Salbe   | her        | bo*         | none                         |                   | skin            | cattle          | exal (epicutan)         |                 | na   | na  | 646 | 51  |    |
|                                            |                                                  | Heidnisch Wundkraut- Salbe   |            |             |                              |                   |                 |                 |                         |                 | na   | na  | 646 | 51  |    |
|                                            |                                                  | Heidnisch Wundkraut- Salbe   |            |             |                              |                   |                 | cattle, calf    | exal (epicutan)         |                 | na   | na  | 646 | 51  |    |
|                                            |                                                  | Goldrutencreme               |            | wh          | oil/fat (rt)                 | skin              | cattle          |                 | exal (epicutan)         |                 | na   | na  | 663 | 50  |    |
|                                            |                                                  | Goldrutencreme               |            |             |                              |                   |                 |                 |                         |                 | na   | na  | 663 | 50  |    |
| <i>Tanacetum parthenium</i> (L.) Sch. Bip. | Mutterkraut                                      | her                          | cu         | none        |                              | varia             | rabbit          | int (oral)      | na                      |                 | na   | 331 | 43  |     |    |
| <i>Tanacetum vulgare</i> L.                | Rainfarn- Tee                                    | her                          | wh         | water (inf) |                              | para              | cattle, calf    | exin (epicutan) |                         | na              | na   | 458 | 66  |     |    |
| Betulaceae                                 | <i>Betula pendula</i> Roth                       | Birkenrinden- Tee            | bar        | bo          | water (dec)                  |                   | inifer          | cattle          |                         | na              | na   | 601 | 58  |     |    |
| Boraginaceae                               | <i>Symphytum officinale</i> L.<br>(vs-no: 71205) | Beinwell                     | lea        | cu          | none                         |                   | musc            | cattle, calf    | exin (epicutan)         |                 | da   | na  | 261 | 34  |    |
|                                            |                                                  | Beinwell                     |            |             |                              |                   |                 | goat            | exin (epicutan)         |                 | da   | na  | 261 | 34  |    |
|                                            |                                                  | Wallwurz                     |            | wh          | none                         |                   | musc            | nsas            | exin (epicutan)         |                 | da   | na  | 592 | 59  |    |
|                                            |                                                  | Wallwurz- Emulsion           | rob        | bo*         | none                         |                   | musc            | cattle, calf    | exin (epicutan)         |                 | na   | na  | 222 | 32  |    |
|                                            |                                                  | Beinwell- Tinktur            |            | cu          | alcohol (rt)                 |                   | skin            | calf            | exal (epicutan)         |                 | 4.43 | od  | 517 | 71  |    |
|                                            |                                                  | Beinwell- Salbe              |            |             | oil/fat (et)                 |                   | musc            | nsas            | exin (epicutan)         |                 | 6.35 | od  | 352 | 45  |    |
|                                            |                                                  | Wallwurz- Salbe              |            |             |                              |                   | skin            | nsas            | exal (epicutan)         |                 | 6.67 | od  | 633 | 52  |    |
|                                            |                                                  | Wallwurz- Salbe              |            |             | oil/fat (rt)                 |                   | musc            | cattle          | exin (epicutan)         |                 | 1.82 | od  | 383 | 56  |    |
|                                            |                                                  | Wallwurz- Salbe              |            |             |                              |                   |                 | cattle, calf    | exin (epicutan)         |                 | 3.45 | ew  | 562 | 68  |    |
|                                            |                                                  | Beinwell- Tinktur            |            | wh          | alcohol (rt)                 |                   | mast            | cattle          | exin (epicutan)         |                 | 8.33 | ew  | 270 | 35  |    |
|                                            |                                                  | Beinwell- Tinktur            |            |             |                              |                   | musc            | cattle          | exin (epicutan)         |                 | 8.33 | ew  | 270 | 35  |    |
|                                            |                                                  | Wallwurz- Schnaps            |            |             |                              |                   |                 |                 |                         |                 | 3.51 | ew  | 657 | 51  |    |
|                                            |                                                  | Beinwell- Tinktur            |            |             |                              |                   | skin            | nsas            | exal (epicutan)         |                 | 4.26 | ew  | 581 | 65  |    |
|                                            |                                                  | Beinwell                     |            |             | none                         |                   | musc            | cattle          | exin (epicutan)         |                 | da   | na  | 706 | 47  |    |
|                                            |                                                  | Wallwurz                     |            |             |                              |                   |                 | cattle, calf    | exin (epicutan)         |                 | da   | na  | 656 | 51  |    |
|                                            |                                                  | Wallwurz                     |            |             |                              |                   |                 | nsas            | exin (epicutan)         |                 | da   | na  | 591 | 59  |    |
| Beinwell                                   |                                                  |                              |            |             | skin                         | nsas              | exal (epicutan) |                 | da                      | na              | 580  | 65  |     |     |    |
| Brassicaceae                               | <i>Brassica napus</i> L.                         | Rapsöl& Schnaps              | fsb        | bo          | none                         |                   | gastr           | calf            | int (oral)              | 7.84            |      | od  | 602 | 58  |    |
|                                            |                                                  | Rapsöl& Schnaps              |            |             |                              |                   |                 | cattle          | int (oral)              | 0.78            |      | od  | 602 | 58  |    |
|                                            |                                                  | Rapsöl                       |            |             |                              |                   |                 | para            | calf                    | exin (epicutan) |      | da  | na  | 283 | 36 |
|                                            |                                                  | Schwefelblüten& Rapsöl       |            |             |                              |                   | skin            | cattle, calf    | exal (epicutan)         |                 | da   | na  | 702 | 47  |    |
|                                            | <i>Brassica oleracea</i> L.                      | Kabisblatt                   | lea        | cu          | none                         |                   | musc            | cattle          | exin (epicutan)         |                 | da   | na  | 271 | 35  |    |
|                                            |                                                  | Kohl                         |            |             |                              |                   |                 | cattle, calf    | exin (epicutan)         |                 | da   | na  | 658 | 51  |    |
|                                            |                                                  | Kohl                         |            |             |                              |                   | skin            | cattle          | exal (epicutan)         |                 | da   | na  | 658 | 51  |    |
|                                            |                                                  | Kohl                         |            |             |                              |                   |                 |                 |                         |                 | da   | na  | 265 | 34  |    |
|                                            | Kohl                                             |                              |            |             |                              |                   | nsas            | exal (epicutan) |                         | da              | na   | 634 | 52  |     |    |
|                                            | <i>Capsella bursa-pastoris</i> (L.) Medik        | Hirtentäschli- Tee           | her        | wh          | water (rt)                   |                   | varia           | cattle          | int (oral)              | 0.05            |      | rd  | 489 | 67  |    |

| Botanical family      | Plant species                                                 | Recipe name designated by DP | Plant part | Origin      | Extraction procedure on farm | Categories of use | Animal treated  | Administration  | Daily dosage [g/kg0.75] | Conc [g/100g] | Ver | RN  | DP  |
|-----------------------|---------------------------------------------------------------|------------------------------|------------|-------------|------------------------------|-------------------|-----------------|-----------------|-------------------------|---------------|-----|-----|-----|
| <b>Cannabaceae</b>    | <i>Cannabis sativa</i> L.                                     | Futterhanf                   | her        | bo          | none                         | streng            | cattle          | int (oral)      | na                      |               | na  | 650 | 51  |
| <b>Chenopodiaceae</b> | <i>Chenopodium bonus-henricus</i> L.                          | Wundsalbe                    | lea        | wh          | oil/fat (rt)                 | skin              | nsas            | exal (epicutan) |                         | na            | na  | 456 | 66  |
| <b>Cupressaceae</b>   | <i>Juniperus communis</i> L.s.str                             | Wacholdersalbe               | twb        | wh          | alcohol (rt)                 | mast              | cattle          | exal (epicutan) |                         | na            | na  | 395 | 57  |
|                       |                                                               | Wacholdersalbe               |            |             | alcohol (rt)                 | musc              | cattle          | exin (epicutan) |                         | na            | na  | 395 | 57  |
|                       |                                                               | Wachholder                   |            |             | none                         | streng            | cattle, calf    | tohe            | tohe                    | tohe          | na  | 453 | 66  |
|                       |                                                               | Wachholder                   |            |             |                              |                   |                 | tohe            | tohe                    | tohe          | na  | 453 | 66  |
|                       | <i>Thuja occidentalis</i> L.                                  | Thuja- Tee                   | twb        | cu          | water (inf)                  | infer             | cattle          | int (oral)      | 0.01                    |               | ew  | 409 | 57  |
|                       | Thuja- Tee                                                    |                              | wh         | water (inf) | infer                        | cattle            | int (oral)      | na              |                         | na            | 558 | 73  |     |
| <b>Equisetaceae</b>   | <i>Equisetum arvense</i> L.                                   | Katzenschwanz- Tee           | her        | wh          | water (inf)                  | gastr             | calf            | int (oral)      | 0.07                    |               | ew  | 642 | 52  |
| <b>Ericaceae</b>      | <i>Vaccinium myrtillus</i> L.                                 | Heidelbeersaft               | fsb        | wh          | water (dec)                  | gastr             | calf            | int (oral)      | na                      |               | na  | 511 | 71  |
|                       |                                                               | Heidelbeerstauden- Tee       | twb        | wh          | water (dec)                  | gastr             | calf            | int (oral)      | 0.47                    |               | ew  | 681 | 48  |
| <b>Fabaceae</b>       | <i>Anthyllis vulneraria</i> L.s.str.                          | Wundklee                     | flo        | wh          | water (inf)                  | skin              | cattle          | exal (epicutan) |                         | na            | na  | 431 | 61  |
|                       |                                                               | Eichenrindenpulver           | bar        | bo          | none                         | gastr             | calf            | int (oral)      | 0.78                    |               | od  | 372 | 55  |
|                       |                                                               | Eichenrindentee              |            | wh          | water (dec)                  | gastr             | calf            | int (oral)      | 0.08                    |               | rd  | 474 | 69  |
|                       |                                                               | Eichenrindentee              |            |             |                              |                   | cattle          | int (oral)      | 0.05                    |               | od  | 405 | 57  |
|                       |                                                               | Eichenrindentee              |            |             |                              |                   | infer           | cattle          | int (vaut)              |               | 0.8 | od  | 678 |
|                       | Eichenrinde                                                   |                              |            |             |                              | cattle            | exal (epicutan) |                 | na                      | na            | 444 | 64  |     |
| <b>Gentianaceae</b>   | <i>Gentiana lutea</i> L.                                      | Enzianschnaps                | rob        | wh          | alcohol (rt)                 | gastr             | calf            | int (oral)      | 0.03                    |               | ew  | 476 | 69  |
| <b>Geraniaceae</b>    | <i>Geranium robertianum</i> L.s.str.<br>(vs no: 71213, 71220) | Storchenschnabel             | her        | bo          | none                         | infer             | cattle          | int (oral)      | 0.11                    |               | od  | 465 | 69  |
|                       |                                                               | Storchenschnabelsalbe        |            | cu          | oil/fat (rt)                 | skin              | nsas            | exal (epicutan) |                         | 0.9           | ew  | 451 | 66  |
|                       |                                                               | Storchenschnabeltinktur      |            | wh          | alcohol (rt)                 | behav             | cattle          | int (oral)      | 0.001                   |               | ew  | 396 | 57  |
|                       |                                                               | Storchenschnabel             |            |             | none                         | infer             | cattle          | int (oral)      | 0.02                    |               | rd  | 641 | 52  |
|                       |                                                               | Storchenschnabelcreme        |            |             | oil/fat (et)                 | skin              | cattle, calf    | exal (epicutan) |                         | 0.94          | od  | 516 | 71  |
|                       |                                                               | Storchenschnabelsalbe        |            |             |                              |                   | cattle          | exal (epicutan) |                         | 0.74          | ew  | 568 | 68  |
|                       |                                                               | Storchenschnabelsalbe        |            |             |                              |                   | cattle, calf    | exal (epicutan) |                         | 0.74          | ew  | 568 | 68  |
|                       |                                                               | Storchenschnabelsalbe        |            |             |                              |                   |                 |                 |                         | 0.74          | ew  | 568 | 68  |
|                       | Storchenschnabelsalbe                                         |                              |            |             |                              | dog               | exal (epicutan) |                 | 0.71                    | ew            | 328 | 43  |     |
|                       | <i>Pelargonium sidoides</i> DC                                | Pelargo®                     | rob        | bo*         | none                         | resp              | calf            | int (oral)      | na                      |               | na  | 254 | 34  |

| Botanical family          | Plant species                                                  | Recipe name designated by DP | Plant part | Origin      | Extraction procedure on farm | Categories of use | Animal treated | Administration  | Daily dosage [g/kg0.75] | Conc [g/100g]   | Ver  | RN   | DP  |     |    |
|---------------------------|----------------------------------------------------------------|------------------------------|------------|-------------|------------------------------|-------------------|----------------|-----------------|-------------------------|-----------------|------|------|-----|-----|----|
| Hypericaceae              | <i>Hypericum perforatum</i> L.<br>(vs no: 71202, 71216, 71223) | Johanniskraut- Öl            | flo        | bo*         | none                         | musc              | cattle         | exin (epicutan) |                         | na              | na   | 497  | 72  |     |    |
|                           |                                                                | Johannisöl                   |            |             |                              | skin              | calf           | exal (epicutan) |                         | na              | na   | 596  | 58  |     |    |
|                           |                                                                | Johannisöl                   |            |             |                              |                   |                | cattle          | exin (epicutan)         |                 | na   | na   | 596 | 58  |    |
|                           |                                                                | Johannisöl                   |            |             |                              |                   |                | cattle          | exal (epicutan)         |                 | na   | na   | 596 | 58  |    |
|                           |                                                                | Johannisöl                   |            | cu          |                              | oil/fat (rt)      | infer          | cattle          | int (vaut)              |                 | 0.76 | ew   | 387 | 57  |    |
|                           |                                                                | Johannisöl                   |            |             |                              |                   | musc           | nsas            | exin (epicutan)         |                 | 1.49 | ew   | 346 | 45  |    |
|                           |                                                                | Johannisöl                   |            |             |                              |                   | skin           | calf            | exin (epicutan)         |                 | 0.76 | ew   | 387 | 57  |    |
|                           |                                                                | Johannisöl                   |            |             |                              |                   |                | cattle          | exal (epicutan)         |                 | 2    | ew   | 612 | 54  |    |
|                           |                                                                | Johannissalbe                |            |             |                              |                   |                |                 |                         |                 | 0.66 | ew   | 390 | 57  |    |
|                           |                                                                | Johannisöl                   |            |             |                              |                   |                | cattle, calf    | exal (epicutan)         |                 | 2    | ew   | 612 | 54  |    |
|                           |                                                                | Johannisöl                   |            |             |                              |                   |                |                 |                         |                 | 2    | ew   | 612 | 54  |    |
|                           |                                                                | Johannisöl                   |            |             |                              |                   |                |                 |                         |                 | 2    | od   | 376 | 56  |    |
|                           |                                                                | Johannisöl                   |            |             | wh                           |                   | oil/fat (rt)   | infer           | cattle                  | int (vaut)      |      | 3    | od  | 518 | 71 |
|                           |                                                                | Johannisöl                   |            |             |                              |                   |                | mast            | cattle                  | exin (epicutan) |      | 3    | od  | 518 | 71 |
|                           |                                                                | Johannistinktur              |            |             |                              |                   |                | musc            | cattle                  | exin (epicutan) |      | 1.89 | ew  | 427 | 61 |
|                           |                                                                | Johanniskraut in Olivenöl    |            |             |                              |                   |                |                 | nsas                    | exin (epicutan) |      | 1.43 | ew  | 262 | 34 |
|                           |                                                                | Johanniskraut- Öl            |            |             |                              |                   |                | skin            | cattle                  | exal (epicutan) |      | 1.96 | ew  | 481 | 69 |
|                           |                                                                | Johannisöl                   |            |             |                              |                   |                |                 |                         |                 |      | 3    | od  | 518 | 71 |
|                           |                                                                | Johanniskraut- Öl            |            |             |                              |                   |                |                 | cattle, calf            | exal (epicutan) |      | 1.96 | ew  | 481 | 69 |
| Johannisöl                |                                                                |                              |            |             |                              |                   |                |                 |                         | 0.62            | ew   | 590  | 59  |     |    |
| Johannistinktur           |                                                                |                              |            |             |                              |                   |                |                 |                         | 1.89            | ew   | 427  | 61  |     |    |
| Juglandaceae              | <i>Juglans regia</i> L.                                        | Nussbaumblätter              | lea        | wh          | none                         | para              | calf           | tohe            | tohe                    | tohe            | na   | 653  | 51  |     |    |
| Lamiaceae                 | <i>Lavandula angustifolia</i> Mill.                            | Lavendelsträusschen          | her        | cu          | none                         | para              | nsas           | tohe            | tohe                    | tohe            | na   | 332  | 43  |     |    |
|                           |                                                                | Lavendelöl                   |            |             |                              | oil/fat (rt)      | skin           | cattle, calf    | exal (epicutan)         |                 | 9.09 | ew   | 613 | 54  |    |
|                           |                                                                | Lavendelöl                   |            |             |                              |                   | streng         | cattle, calf    | tohe                    | tohe            | tohe | ew   | 613 | 54  |    |
|                           | <i>Mentha canadensis</i> L.                                    | NPJ Liniment®                | lea        | bo*         | none                         | none              | mast           | cattle          | exin (epicutan)         |                 | na   | na   | 296 | 37  |    |
|                           |                                                                | OPIFIX®                      |            |             |                              |                   |                |                 |                         |                 | na   | na   | 339 | 44  |    |
|                           |                                                                | OPIFIX®                      |            |             |                              |                   | musc           | cattle          | exin (epicutan)         |                 | na   | na   | 339 | 44  |    |
|                           |                                                                | Pfefferminztee               | na         | bo          | water (inf)                  | gastr             | calf           |                 | int (oral)              |                 | 0.62 | od   | 334 | 44  |    |
|                           | <i>Salvia officinalis</i> L.                                   | Pfefferminztee               |            |             |                              |                   |                |                 |                         |                 | 1.24 | od   | 334 | 44  |    |
|                           |                                                                | Salbei                       | lea        | cu          | none                         | none              | resp           | calf            | int (oral)              |                 | 0.02 | ew   | 285 | 36  |    |
|                           |                                                                | Salbei                       |            |             |                              |                   | skin           | rabbit          | int (oral)              |                 | na   | na   | 329 | 43  |    |
| <i>Thymus vulgaris</i> L. | Salbeitee                                                      | lea                          | cu         | water (inf) | gastr                        | calf              |                | int (oral)      |                         | 0.02            | ew   | 636  | 52  |     |    |
|                           | ätherisches Öl Thymian                                         | her                          | bo*        | none        | none                         | resp              | calf           | int (nasal)     |                         | na              | na   | 253  | 34  |     |    |
| Lauraceae                 | <i>Cinnamomum verum</i> J.Presl                                | Zimt                         | bar        | bo          | none                         | gastr             | calf           | int (oral)      |                         | 0.24            | ew   | 553  | 73  |     |    |

| Botanical family    | Plant species                    | Recipe name designated by DP                | Plant part | Origin | Extraction procedure on farm | Categories of use | Animal treated  | Administration  | Daily dosage [g/kg0.75] | Conc [g/100g] | Ver  | RN  | DP  |    |
|---------------------|----------------------------------|---------------------------------------------|------------|--------|------------------------------|-------------------|-----------------|-----------------|-------------------------|---------------|------|-----|-----|----|
| Linaceae            | <i>Linum usitatissimum</i> L.    | Leinsamen                                   | fsb        | bo     | none                         | infer             | cattle          | int (oral)      | 0.62                    |               | ew   | 599 | 58  |    |
|                     |                                  | Leinsamen                                   |            |        |                              | streng            | cattle          | int (oral)      | 1.57                    |               | od   | 309 | 39  |    |
|                     |                                  | Leinsamenschleim                            |            |        |                              | water (dec)       | gastr           | calf            | int (oral)              | 4.21          |      | rd  | 584 | 65 |
|                     |                                  | Leinsamenschleim                            |            |        |                              |                   |                 |                 |                         | 4.21          |      | rd  | 584 | 65 |
|                     |                                  | Leinsamenschleim                            |            |        |                              |                   |                 |                 |                         | 15.69         |      | od  | 527 | 70 |
|                     |                                  | Leinsamentee                                |            |        |                              |                   |                 |                 |                         | 10.97         |      | od  | 214 | 31 |
|                     |                                  | Leinsamen                                   |            |        |                              |                   |                 | cattle          | int (oral)              | 0.78          |      | od  | 508 | 71 |
|                     |                                  | Leinsamenmus                                |            |        |                              |                   |                 |                 |                         | 7.78          |      | od  | 379 | 56 |
|                     |                                  | Leinsamenschleim                            |            |        |                              |                   |                 |                 |                         | 7.78          |      | od  | 700 | 47 |
|                     |                                  | Leinsamenschleim                            |            |        |                              |                   |                 |                 |                         | 1.62          |      | rd  | 584 | 65 |
|                     |                                  | Leinsamenschleim                            |            |        |                              |                   |                 |                 |                         | 1.62          |      | rd  | 584 | 65 |
|                     |                                  | Leinsamenschleimspülung                     |            |        |                              |                   | infer           | cattle          | int (vaut)              |               | 2.22 | rd  | 242 | 33 |
|                     |                                  | Leinsamenschleim                            |            |        |                              |                   | musc            | cattle          | exin (epicutan)         |               | 20   | od  | 310 | 39 |
| Lycopodiaceae       | <i>Lycopodium clavatum</i> L.    | Bärlapp                                     | her        | wh     | none                         | musc              | cattle, calf    | tohe            | tohe                    | tohe          | na   | 204 | 30  |    |
| Malvaceae           | <i>Althaea officinalis</i> L.    | Eibischblätter                              | lea        | wh     | water (inf)                  | skin              | cattle          | exal (epicutan) |                         | na            | na   | 392 | 57  |    |
|                     |                                  | <i>Malva neglecta</i> Wallr. (vs no: 71212) | flo        | wh     | water (inf)                  | skin              | cattle, calf    | exal (epicutan) |                         | 0.1           | ew   | 430 | 61  |    |
|                     |                                  | Chäslichrut                                 | her        | bo     | water (inf)                  | skin              | cattle          | exal (epicutan) |                         | 0.4           | rd   | 499 | 72  |    |
|                     |                                  | Malventee                                   |            |        | water (inf)                  | skin              | cattle          | exal (epicutan) |                         | 0.2           | od   | 323 | 43  |    |
|                     |                                  | Malventee                                   |            |        | water (inf)                  | skin              | horse           | exal (epicutan) |                         | 0.2           | od   | 323 | 43  |    |
|                     |                                  | Chäslichrut- Salbe                          |            | cu     | oil/fat (rt)                 | skin              | cattle          | exal (epicutan) |                         | 1.82          | od   | 375 | 56  |    |
|                     |                                  | Chäslichrut- Salbe                          |            |        |                              |                   |                 |                 |                         | 1.82          | od   | 375 | 56  |    |
|                     |                                  | Chäslichrut - Salbe                         |            |        |                              |                   |                 | cattle, calf    | exal (epicutan)         |               | na   | na  | 566 | 68 |
|                     |                                  | Chäslichrut                                 |            |        | water (inf)                  | skin              | cattle          | exal (epicutan) |                         | na            | na   | 662 | 50  |    |
|                     |                                  | Chäslichrut - Tee                           |            |        |                              |                   | cattle, calf    | exal (epicutan) |                         | 0.4           | od   | 565 | 68  |    |
|                     |                                  | Chäslichrut - salbe                         |            | wh     | oil/fat (et)                 | musc              | cattle, calf    | exin (epicutan) |                         | 1.82          | od   | 434 | 62  |    |
|                     |                                  | Chäslichrut - Salbe                         |            |        | oil/fat (et)                 | skin              | cattle          | exal (epicutan) |                         | 1.82          | od   | 434 | 62  |    |
|                     |                                  | Chäslichrut - Bad                           |            |        | water (inf)                  | skin              | calf            | exal (epicutan) |                         | na            | na   | 433 | 62  |    |
|                     |                                  | Chäslichrut - Tee                           |            |        |                              |                   |                 |                 |                         | na            | na   | 696 | 47  |    |
|                     |                                  | Chäslichrut                                 |            |        |                              |                   |                 | cattle          | exal (epicutan)         |               | 0.8  | od  | 298 | 37 |
|                     |                                  | Chäslichrut                                 |            |        |                              |                   |                 |                 |                         | 0.8           | od   | 298 | 37  |    |
|                     |                                  | Chäslichrut - Tee                           |            |        |                              |                   |                 |                 |                         | na            | na   | 696 | 47  |    |
|                     |                                  | Chäslichrut- Bad                            |            |        |                              |                   |                 |                 |                         | na            | na   | 433 | 62  |    |
|                     |                                  | Chäslichrut- Bad                            |            |        |                              |                   |                 |                 |                         | na            | na   | 433 | 62  |    |
|                     |                                  | Chäslichrut - Bad                           |            |        |                              |                   |                 | cattle, calf    | exal (epicutan)         |               | na   | na  | 217 | 31 |
| Chäslichrut - Tee   |                                  |                                             |            |        |                              | horse             | exal (epicutan) |                 | na                      | na            | 696  | 47  |     |    |
| Chäslichrut - Tee   |                                  |                                             | water (rt) | skin   | cattle                       | exal (epicutan)   |                 | na              | na                      | 635           | 52   |     |     |    |
| Chäslichrut - Tee   |                                  |                                             |            | skin   | nsas                         | exal (epicutan)   |                 | na              | na                      | 635           | 52   |     |     |    |
| Tilia cordata Mill. | <i>Tilia cordata</i> Mill.       | Lindenbast                                  | bar        | bo     | none                         | infer             | cattle          | int (oral)      | 0.19                    |               | od   | 373 | 55  |    |
|                     |                                  | Lindenbast                                  |            |        | water (dec)                  | infer             | cattle          | int (oral)      | 0.13                    |               | od   | 414 | 60  |    |
|                     |                                  | Lindenbast- Tee                             |            |        |                              |                   |                 |                 |                         | na            | na   | 600 | 58  |    |
|                     |                                  | Lindenrinden- Tee                           |            | wh     | water (dec)                  | infer             | cattle          | int (oral)      |                         | na            | na   | 677 | 48  |    |
|                     |                                  | Lindenbast                                  |            |        |                              |                   |                 | int (vaut)      |                         | na            | na   | 252 | 33  |    |
| Myristicaceae       | <i>Myristica fragrans</i> Houtt. | Muskatnuss                                  | fsb        | bo     | none                         | gastr             | cattle          | int (oral)      | 0.05                    |               | ew   | 408 | 57  |    |
|                     |                                  | Muskatnuss                                  |            |        |                              |                   |                 |                 | 0.05                    |               | ew   | 236 | 33  |    |

| Botanical family  | Plant species                                                                   | Recipe name designated by DP | Plant part          | Origin | Extraction procedure on farm | Categories of use | Animal treated | Administration  | Daily dosage [g/kg0.75] | Conc [g/100g] | Ver   | RN  | DP  |    |
|-------------------|---------------------------------------------------------------------------------|------------------------------|---------------------|--------|------------------------------|-------------------|----------------|-----------------|-------------------------|---------------|-------|-----|-----|----|
| Myrtaceae         | <i>Melaleuca alternifolia</i><br>Maiden&Betche ex Cheel                         | Teebaumöl                    | lea                 | bo*    | none                         | skin              | nsas           | exal (epicutan) |                         | na            | na    | 255 | 34  |    |
|                   |                                                                                 | Teebaumöl                    |                     |        |                              | streng            | nsas           | tohe            | tohe                    | tohe          | na    | 255 | 34  |    |
|                   |                                                                                 | Teebaumöl                    | na                  | bo*    | none                         | mast              | cattle         | exin (epicutan) |                         | na            | na    | 340 | 44  |    |
| Oleaceae          | <i>Fraxinus excelsior</i> L.                                                    | Eschenlaub                   | lea                 | wh     | none                         | para              | calf           | int (oral)      | na                      |               | na    | 473 | 69  |    |
|                   |                                                                                 | Esche                        | twb                 | wh     | none                         | streng            | cattle         | int (oral)      | na                      |               | na    | 463 | 66  |    |
|                   |                                                                                 | <i>Olea europaea</i> L.      | Olivenöl und Eigelb | fsb    | bo                           | none              | mast           | cattle          | exin (epicutan)         |               | da    | na  | 406 | 57 |
| Orobanchaceae     | <i>Pedicularis verticillata</i> L.                                              | Läusekraut- Tee              | her                 | wh     | water (inf)                  | para              | cattle, calf   | exin (epicutan) |                         | na            | na    | 459 | 66  |    |
| Pinaceae          | <i>Abies alba</i> Mill.<br><i>Picea abies</i> (L.) H. Karst.                    | Weisstannen- Äste            | twb                 | wh     | none                         | streng            | cattle, calf   | int (oral)      | na                      |               | na    | 683 | 48  |    |
|                   |                                                                                 | Harzsalbe                    | exc                 | bo     | oil/fat (et)                 | mast              | cattle         | exin (epicutan) |                         | na            | na    | 377 | 56  |    |
|                   |                                                                                 | Harzsalbe                    |                     |        |                              | resp              | calf           | exin (epicutan) |                         | na            | na    | 377 | 56  |    |
|                   |                                                                                 | Harzsalbe                    |                     |        |                              | skin              | cattle         | exal (epicutan) |                         | na            | na    | 377 | 56  |    |
|                   |                                                                                 | Tannenharz                   |                     | wh     | none                         | skin              | cattle, calf   | exal (epicutan) |                         | da            | na    | 478 | 69  |    |
|                   |                                                                                 | Harzsalbe                    |                     |        | oil/fat (et)                 | mast              | cattle         | exin (epicutan) |                         | 3.53          | od    | 515 | 71  |    |
|                   |                                                                                 | Harzsalbe                    |                     |        |                              |                   |                |                 |                         | 27.27         | od    | 432 | 62  |    |
|                   |                                                                                 | Harzsalbe                    |                     |        |                              | resp              | calf           | exin (epicutan) |                         | 27.27         | od    | 432 | 62  |    |
|                   |                                                                                 | Harzsalbe                    |                     |        |                              | skin              | calf           | exal (epicutan) |                         | 27.27         | od    | 432 | 62  |    |
|                   |                                                                                 | Harzsalbe                    |                     |        |                              |                   | cattle         | exal (epicutan) |                         | 3.53          | od    | 515 | 71  |    |
|                   |                                                                                 | Harzsalbe                    |                     |        |                              |                   |                |                 |                         | 27.27         | od    | 432 | 62  |    |
|                   |                                                                                 | Harzsalbe                    |                     |        |                              |                   |                |                 |                         | 27.27         | od    | 432 | 62  |    |
|                   |                                                                                 | Harzsalbe                    |                     |        |                              |                   |                |                 |                         | 31.75         | od    | 343 | 45  |    |
|                   |                                                                                 | Harzsalbe                    |                     |        |                              |                   |                |                 | int (oral)              | na            |       | na  | 432 | 62 |
|                   |                                                                                 | Harzsalbe                    |                     |        |                              |                   |                | cattle, calf    | exal (epicutan)         |               | na    | na  | 480 | 69 |
|                   |                                                                                 | Harzsalbe                    |                     |        |                              |                   |                |                 |                         | na            | na    | 480 | 69  |    |
|                   |                                                                                 | Harzsalbe                    |                     |        |                              |                   |                |                 |                         | 27.27         | od    | 432 | 62  |    |
|                   |                                                                                 | Harzsalbe                    |                     |        |                              |                   |                |                 |                         | 27.27         | od    | 432 | 62  |    |
|                   |                                                                                 | Harzsalbe                    |                     |        |                              |                   |                |                 |                         | 12.93         | od    | 393 | 57  |    |
|                   |                                                                                 | Harzsalbe                    |                     |        |                              |                   |                | nsas            | exal (epicutan)         |               | 31.75 | od  | 343 | 45 |
|                   |                                                                                 | Rottannen- Äste              | twb                 | wh     | none                         | resp              | calf           | int (oral)      |                         | na            |       | na  | 645 | 51 |
| Rottannen- Zweige |                                                                                 |                              |                     |        |                              |                   |                | na              |                         | na            | 288   | 36  |     |    |
| Tannenäste        |                                                                                 |                              |                     |        |                              |                   |                | na              |                         | na            | 484   | 69  |     |    |
| Tannenäste        |                                                                                 |                              |                     |        |                              |                   |                | na              |                         | na            | 440   | 62  |     |    |
| Rottannen- Äste   |                                                                                 |                              |                     |        | streng                       | cattle, calf      | int (oral)     | na              |                         | na            | 682   | 48  |     |    |
| Plantaginaceae    | <i>Euphrasia officinalis</i> L.<br><i>Plantago lanceolata</i> L. (vs no: 71211) | Augentrost                   | her                 | wh     | water (inf)                  | sens              | cattle, calf   | exal (konj)     |                         | 1             | od    | 461 | 66  |    |
|                   |                                                                                 | Spitzwegerich                | lea                 | wh     | none                         | resp              | calf           | int (oral)      | 0.12                    |               | ew    | 280 | 36  |    |
|                   |                                                                                 | Spitzwegerich-Öl             |                     |        | oil/fat (rt)                 | mast              | cattle         | exin (epicutan) |                         | 0.32          | ew    | 326 | 43  |    |
| Poaceae           | <i>Avena sativa</i> L.s.str.                                                    | Haferschleimsuppe            | fsb                 | bo     | water (dec)                  | gastr             | calf           | int (oral)      | 5.6                     |               | ew    | 503 | 72  |    |
|                   |                                                                                 | Hafer                        |                     | cu     | none                         | streng            | cattle         | int (oral)      | 0.31                    |               | ew    | 227 | 33  |    |
|                   |                                                                                 | Haferwickel                  |                     |        | water (dec)                  | resp              | calf           | exin (epicutan) |                         | na            | na    | 266 | 34  |    |

| Botanical family | Plant species                                         | Recipe name designated by DP | Plant part | Origin      | Extraction procedure on farm | Categories of use | Animal treated | Administration  | Daily dosage [g/kg0.75] | Conc [g/100g]   | Ver  | RN  | DP  |    |
|------------------|-------------------------------------------------------|------------------------------|------------|-------------|------------------------------|-------------------|----------------|-----------------|-------------------------|-----------------|------|-----|-----|----|
| Polygonaceae     | <i>Rumex obtusifolius</i> L.<br>(vs no: 71208, 71218) | Blacke                       | lea        | wh          | none                         | musc              | cattle, calf   | exin (epicutan) |                         | da              | na   | 260 | 34  |    |
|                  |                                                       | Blacke                       |            |             |                              |                   | goat           | exin (epicutan) |                         | da              | na   | 260 | 34  |    |
|                  |                                                       | Blacke                       |            |             |                              |                   | horse          | exin (epicutan) |                         | da              | na   | 325 | 43  |    |
|                  |                                                       | Blacke                       |            |             |                              |                   | nsas           | exal (epicutan) |                         | da              | na   | 424 | 61  |    |
|                  |                                                       | Blackensalbe                 |            |             |                              | oil/fat (et)      | mast           | cattle          | exin (epicutan)         | 3.64            | od   | 514 | 71  |    |
|                  |                                                       | Blackensalbe                 |            |             |                              |                   |                |                 |                         | 1.82            | od   | 435 | 62  |    |
|                  |                                                       | Blackensalbe                 |            |             |                              |                   |                |                 |                         | 3.08            | od   | 215 | 31  |    |
|                  |                                                       | Blackensalbe                 |            |             |                              |                   | musc           | cattle          | exin (epicutan)         | 20              | od   | 403 | 57  |    |
|                  |                                                       | Blackensalbe                 |            |             |                              |                   |                | cattle, calf    | exin (epicutan)         | 3.08            | od   | 215 | 31  |    |
|                  |                                                       | Blackensalbe                 |            |             |                              |                   | skin           | cattle          | exal (epicutan)         | 2.77            | od   | 275 | 35  |    |
|                  |                                                       | Blackensalbe                 |            |             |                              |                   |                | cattle, calf    | exal (epicutan)         | 3.59            | ew   | 648 | 51  |    |
|                  |                                                       | Blackensalbe                 |            |             |                              |                   |                |                 |                         | 1.82            | od   | 435 | 62  |    |
|                  |                                                       | Blackensalbe                 |            |             |                              |                   |                | nsas            | exal (epicutan)         | 2.77            | od   | 275 | 35  |    |
|                  |                                                       | Blackensalbe                 |            |             |                              |                   | varia          | cattle          | exin (epicutan)         | 3.64            | od   | 514 | 71  |    |
|                  |                                                       | Blackensalbe                 |            |             |                              |                   | oil/fat (rt)   | mast            | cattle                  | exin (epicutan) | 10   | od  | 631 | 52 |
|                  |                                                       | Blackensalbe                 |            |             |                              |                   |                |                 |                         | 1.98            | ew   | 561 | 68  |    |
|                  |                                                       | Blackensalbe                 |            |             |                              |                   |                |                 |                         | 1.52            | ew   | 483 | 69  |    |
|                  |                                                       | Blackensalbe                 |            |             |                              |                   |                | musc            | cattle                  | exin (epicutan) | 1.98 | ew  | 561 | 68 |
|                  |                                                       | Blackensalbe                 |            |             |                              |                   |                |                 | cattle, calf            | exin (epicutan) | 1.52 | ew  | 483 | 69 |
|                  |                                                       | Blackensalbe                 |            |             |                              |                   |                |                 |                         | 1.52            | ew   | 460 | 66  |    |
|                  |                                                       | Blackensalbe                 |            |             |                              |                   | skin           | cattle          | exal (epicutan)         | 1.75            | ew   | 324 | 43  |    |
|                  |                                                       | Blackensalbe                 |            |             |                              |                   |                | cattle, calf    | exal (epicutan)         | 1.52            | ew   | 483 | 69  |    |
|                  |                                                       | Blackensalbe                 |            |             |                              |                   |                | nsas            | exal (epicutan)         | 10              | od   | 631 | 52  |    |
|                  |                                                       | Blackenöl                    |            |             |                              |                   | varia          | cattle          | exin (epicutan)         | 2.33            | ew   | 614 | 54  |    |
|                  |                                                       | Blackensalbe                 |            |             |                              |                   |                |                 |                         | 2               | ew   | 611 | 54  |    |
|                  |                                                       | Blackensalbe                 |            |             |                              |                   |                |                 |                         | 1.98            | ew   | 561 | 68  |    |
|                  |                                                       | Blackenwurzel- Tee           |            | rob         | wh                           | water (dec)       | gastr          | calf            | int (oral)              | 0.82            |      | ew  | 348 | 45 |
|                  |                                                       | Blackenwurzel- Tee           |            |             |                              |                   |                |                 |                         | 1.18            |      | ew  | 207 | 30 |
|                  |                                                       | Blackenwurzel-Tee            |            |             |                              |                   |                |                 |                         | 3.15            |      | od  | 355 | 46 |
|                  |                                                       | Blackentee                   |            |             |                              |                   |                | skin            | cattle, calf            | exal (epicutan) |      | ew  | 583 | 65 |
| Blackentee       |                                                       | wpr                          | wh         | water (inf) | gastr                        | calf              | int (oral)     | 0.78            |                         | ew              | 423  | 61  |     |    |
| Blackentee       |                                                       |                              |            |             |                              | young pig         | int (oral)     | 1.32            |                         | ew              | 423  | 61  |     |    |
| Rhamnaceae       | <i>Rhamnus cathartica</i> L.                          | Kreuzdorn                    | twb        | wh          | none                         | skin              | cattle, calf   | tohe            | tohe                    | tohe            | na   | 468 | 69  |    |
|                  |                                                       | Kreuzdorn                    |            |             |                              |                   |                |                 | tohe                    | tohe            | na   | 359 | 46  |    |
|                  |                                                       | Kreuzdorn                    |            |             |                              |                   |                |                 | tohe                    | tohe            | na   | 286 | 36  |    |
| Rosaceae         | <i>Alchemilla vulgaris</i> L. Agg.                    | Frauenmänteli- Tee           | her        | wh          | water (inf)                  | infer             | cattle         | int (oral)      | 0.03                    |                 | ew   | 488 | 67  |    |
|                  |                                                       | Frauenmänteli- Tee           |            |             |                              |                   |                |                 | 0.03                    |                 | ew   | 488 | 67  |    |
|                  | <i>Crataegus laevigata</i> (Poiret) DC.               | Weissdorn                    | twb        | wh          | none                         | skin              | cattle, calf   | tohe            | tohe                    | tohe            | na   | 504 | 72  |    |
|                  |                                                       | Weissdorn                    |            |             |                              |                   |                |                 | tohe                    | tohe            | na   | 466 | 69  |    |
|                  |                                                       | Weissdorn                    |            |             |                              |                   |                |                 | tohe                    | tohe            | na   | 314 | 39  |    |
|                  |                                                       | Weissdorn                    |            |             |                              |                   |                |                 | tohe                    | tohe            | na   | 287 | 36  |    |
|                  | <i>Malus domestica</i> Borkh.                         | Apfel                        | fruits     | cu          | none                         | gastr             | cattle         | int (oral)      | na                      |                 | na   | 233 | 33  |    |

| Botanical family | Plant species                                            | Recipe name designated by DP | Plant part | Origin | Extraction procedure on farm | Categories of use | Animal treated | Administration  | Daily dosage [g/kg0.75] | Conc [g/100g] | Ver | RN  | DP  |    |
|------------------|----------------------------------------------------------|------------------------------|------------|--------|------------------------------|-------------------|----------------|-----------------|-------------------------|---------------|-----|-----|-----|----|
| Rosaceae         | <i>Potentilla erecta</i> (L.) Raeusch.<br>(vs no: 71201) | Blutwurz- Tinktur            | na         | bo*    | none                         | gastr             | calf           | int (oral)      | na                      |               | na  | 224 | 32  |    |
|                  |                                                          | Blutwurz                     | rob        | bo     | water (dec)                  | gastr             | cattle         | int (oral)      | 0.11                    |               | od  | 507 | 71  |    |
|                  |                                                          | Blutwurz- Tee                |            |        |                              |                   |                |                 |                         | 0.44          |     | od  | 213 | 31 |
|                  |                                                          | Blutwurz- Tinktur            |            | wh     | alcohol (rt)                 | gastr             | calf           | int (oral)      | 0.004                   |               | ew  | 477 | 69  |    |
|                  |                                                          | Blutwurz- Tinktur            |            |        |                              | streng            | calf           | int (oral)      | 0.004                   |               | ew  | 477 | 69  |    |
|                  | <i>Prunus domestica</i> L.                               | Zwetschgensteine             | fsb        | cu     | none                         | para              | pig            | int (oral)      | na                      |               | na  | 250 | 33  |    |
|                  | <i>Prunus spinosa</i> L.                                 | Schwarzdorn                  | twb        | wh     | none                         | skin              | cattle, calf   | tohe            | tohe                    | tohe          | na  | 586 | 65  |    |
|                  |                                                          | Schwarzdorn                  |            |        |                              |                   |                | tohe            | tohe                    | na            | 556 | 73  |     |    |
|                  |                                                          | Schwarzdorn                  |            |        |                              |                   |                | tohe            | tohe                    | na            | 467 | 69  |     |    |
|                  | <i>Rubus idaeus</i> L.                                   | Himbeerstauden               | twb        | wh     | none                         | streng            | cattle         | int (oral)      | na                      |               | na  | 462 | 66  |    |
| Rubiaceae        | <i>Coffea</i> L.                                         | Kaffee- Schnaps              | fsb        | bo     | water (inf)                  | gastr             | calf           | int (oral)      | 0.04                    |               | ew  | 593 | 59  |    |
|                  |                                                          | Kaffee- Schnaps              |            |        |                              |                   | cattle         | int (oral)      | 0.45                    |               | od  | 684 | 46  |    |
|                  |                                                          | Kaffee- Schnaps              |            |        |                              |                   |                |                 | 0.51                    |               | ew  | 578 | 65  |    |
|                  |                                                          | Kaffee- Schnaps              |            |        |                              |                   |                |                 | 0.06                    |               | ew  | 573 | 68  |    |
|                  |                                                          | Kaffee- Schnaps              |            |        |                              |                   |                |                 | 1.06                    |               | ew  | 543 | 73  |    |
|                  |                                                          | Kaffee- Schnaps              |            |        |                              |                   |                |                 | 0.13                    |               | od  | 519 | 71  |    |
|                  |                                                          | Kaffee- Schnaps              |            |        |                              |                   |                |                 | 0.09                    |               | rd  | 500 | 72  |    |
|                  |                                                          | Kaffee- Schnaps              |            |        |                              |                   |                |                 | 0.71                    |               | ew  | 494 | 70  |    |
|                  |                                                          | Kaffee- Schnaps              |            |        |                              |                   |                |                 | 0.07                    |               | od  | 439 | 62  |    |
|                  |                                                          | Kaffee- Schnaps              |            |        |                              |                   |                |                 | 0.19                    |               | od  | 413 | 60  |    |
|                  |                                                          | Kaffee- Schnaps              |            |        |                              |                   |                |                 | 0.19                    |               | od  | 413 | 60  |    |
|                  |                                                          | Kaffee- Schnaps              |            |        |                              |                   |                |                 | 0.04                    |               | od  | 398 | 57  |    |
|                  |                                                          | Kaffee- Schnaps              |            |        |                              |                   |                |                 | 0.45                    |               | od  | 360 | 47  |    |
|                  |                                                          | Kaffee- Schnaps              |            |        |                              |                   |                |                 | 0.31                    |               | od  | 303 | 39  |    |
|                  |                                                          | Kaffee- Schnaps              |            |        |                              |                   |                |                 | 0.31                    |               | od  | 294 | 37  |    |
|                  |                                                          | schwarzer Kaffee             |            |        |                              |                   |                | rabbit          | int (oral)              | 1.58          |     | od  | 317 | 40 |
|                  |                                                          | Kaffee- Schnaps              |            |        |                              |                   |                | young sheep     | int (oral)              | 0.11          |     | ew  | 593 | 59 |
| Kaffee- Schnaps  |                                                          |                              |            |        | infer                        | cattle            | int (oral)     | 0.06            |                         | od            | 211 | 30  |     |    |
| Rutaceae         | <i>Citrus x limon</i> (L.) Burm.f.                       | Zitronensaft                 | fsb        | bo     | none                         | gastr             | calf           | int (oral)      | 0.47                    |               | od  | 416 | 60  |    |
| Salicaceae       | <i>Salix caprea</i> L.                                   | Salweidenzweige              | twb        | wh     | none                         | gastr             | cattle         | int (oral)      | na                      |               | na  | 235 | 33  |    |
| Simaroubaceae    | <i>Quassia amara</i> L.                                  | Fliegenholz                  | bar        | bo     | alcohol (rt)                 | skin              | donkey         | exal (epicutan) |                         | na            | na  | 315 | 40  |    |
| Solanaceae       | <i>Solanum tuberosum</i> L.                              | Kartoffelsalbe               | rob        | cu     | oil/fat (et)                 | skin              | cattle         | exal (epicutan) |                         | 5             | ew  | 401 | 57  |    |
|                  |                                                          | Kartoffelsalbe               |            |        |                              |                   |                |                 |                         | 5             | ew  | 401 | 57  |    |
|                  |                                                          | Kartoffelsalbe               |            |        | oil/fat (rt)                 | skin              | cattle         | exal (epicutan) |                         | 1.72          | ew  | 402 | 57  |    |
|                  |                                                          | Kartoffelsalbe               |            |        |                              |                   |                |                 |                         | 1.72          | ew  | 402 | 57  |    |
| Theaceae         | <i>Camellia sinensis</i> (L.) Kuntze                     | Schwarztee                   | lea        | bo     | water (inf)                  | gastr             | calf           | int (oral)      | 0.53                    |               | ew  | 536 | 73  |    |
|                  |                                                          | Schwarztee                   |            |        |                              |                   |                |                 | 0.56                    |               | rd  | 446 | 64  |    |
|                  |                                                          | Schwarztee                   |            |        |                              |                   |                |                 | 0.12                    |               | od  | 404 | 57  |    |
|                  |                                                          | Schwarztee                   |            |        |                              |                   |                |                 | 1.74                    |               | ew  | 336 | 44  |    |
|                  |                                                          | Schwarztee                   |            |        |                              |                   |                |                 | 0.71                    |               | ew  | 322 | 43  |    |
|                  |                                                          | Schwarztee                   |            |        |                              |                   |                |                 | 0.62                    |               | od  | 273 | 35  |    |
|                  |                                                          | Schwarztee                   |            |        |                              |                   |                | dog             | int (oral)              | 0.18          |     | od  | 273 | 35 |
| Tropaeolaceae    | <i>Tropaeolum majus</i> L.                               | Kapuzinerkresse              | flo        | wh     | none                         | streng            | horse          | int (oral)      | na                      |               | na  | 330 | 43  |    |

| Botanical family | Plant species                                           | Recipe name designated by DP | Plant part | Origin | Extraction procedure on farm | Categories of use | Animal treated | Administration | Daily dosage [g/kg0.75] | Conc [g/100g]   | Ver  | RN   | DP  |     |    |
|------------------|---------------------------------------------------------|------------------------------|------------|--------|------------------------------|-------------------|----------------|----------------|-------------------------|-----------------|------|------|-----|-----|----|
| Urticaceae       | <i>Urtica dioica</i> L.<br>(vs no: 71209, 71210, 71217) | Brennnessel                  | her        | wh     | none                         | behav             | pig            | int (oral)     | 1.05                    |                 | ew   | 399  | 57  |     |    |
|                  |                                                         | Brennnessel                  |            |        |                              | gastr             | cattle         | int (oral)     | na                      |                 | na   | 238  | 33  |     |    |
|                  |                                                         | Brennnessel                  |            |        |                              |                   | donkey         | int (oral)     | 0.79                    |                 | ew   | 316  | 40  |     |    |
|                  |                                                         | Brennnessel                  |            |        |                              |                   | goat           | int (oral)     | na                      |                 | na   | 365  | 52  |     |    |
|                  |                                                         | Brennnessel                  |            |        |                              |                   | sheep          | int (oral)     | na                      |                 | na   | 365  | 52  |     |    |
|                  |                                                         | Brennnessel                  |            |        |                              |                   | infer          | cattle         | int (oral)              | 0.02            |      | ew   | 447 | 65  |    |
|                  |                                                         | Brennnessel                  |            |        |                              |                   |                |                | int (oral)              | 0.03            |      | ew   | 216 | 31  |    |
|                  |                                                         | Brennnessel                  |            |        |                              |                   | skin           | donkey         | int (oral)              | na              |      | na   | 316 | 40  |    |
|                  |                                                         | Brennnessel                  |            |        |                              |                   | streng         | cattle         | int (oral)              | na              |      | na   | 485 | 69  |    |
|                  |                                                         | Brennnessel                  |            |        |                              |                   |                |                |                         | na              |      | na   | 347 | 45  |    |
|                  |                                                         | Brennnessel                  |            |        |                              |                   |                |                |                         | na              |      | na   | 258 | 34  |    |
|                  |                                                         | Brennnessel                  |            |        |                              |                   |                | goat           | int (oral)              | 0.9             |      | ew   | 411 | 61  |    |
|                  |                                                         | Brennnessel                  |            |        |                              |                   |                |                |                         | na              |      | na   | 258 | 34  |    |
|                  |                                                         | Brennnessel                  |            |        |                              |                   |                | hen            | int (oral)              | na              |      | na   | 347 | 45  |    |
|                  |                                                         | Brennnessel                  |            |        |                              |                   |                | horse          | int (oral)              | na              |      | na   | 258 | 34  |    |
|                  |                                                         | Brennnesseln                 |            |        |                              |                   |                | Varia          | cattle                  | int (oral)      | 0.26 |      | ew  | 649 | 51 |
|                  |                                                         | Brennnessel- Tee             |            |        |                              |                   | water (inf)    | gastr          | calf                    | int (oral)      | 0.55 |      | ew  | 630 | 52 |
|                  |                                                         | Brennnessel- Tee             |            |        |                              |                   |                |                |                         |                 | 2.21 |      | ew  | 388 | 58 |
|                  |                                                         | Brennnessel- Tee             |            |        |                              |                   |                |                | cattle                  | int (oral)      | 0.22 |      | ew  | 630 | 52 |
|                  |                                                         | Brennnessel- Tee             |            |        |                              |                   |                |                |                         |                 | 0.96 |      | od  | 386 | 56 |
|                  |                                                         | Brennnessel                  |            |        |                              |                   |                | infer          | cattle                  | int (oral)      | 0.16 |      | ew  | 498 | 72 |
|                  |                                                         | Brennnessel- Tee             |            |        |                              |                   |                |                |                         |                 | 0.1  |      | ew  | 259 | 34 |
|                  |                                                         | Brennnessel- Tee             |            |        |                              |                   |                |                |                         |                 | 0.02 |      | ew  | 575 | 65 |
|                  |                                                         | Brennnessel- Tee             |            |        |                              |                   |                |                |                         |                 | 0.22 |      | ew  | 531 | 73 |
|                  |                                                         | Brennnessel- Tee             |            |        |                              |                   |                |                |                         |                 | 0.26 |      | ew  | 363 | 50 |
|                  |                                                         | Brennnessel- Tee             |            |        |                              |                   |                |                | goat                    | int (oral)      | 0.53 |      | ew  | 259 | 34 |
|                  |                                                         | Brennnessel- Tee             |            |        |                              |                   |                |                | pig                     | int (oral)      | 0.06 |      | ew  | 575 | 65 |
|                  |                                                         | Brennnessel- Tee             |            |        |                              |                   |                | skin           | nsas                    | exal (epicutan) |      | 0.24 | ew  | 422 | 61 |
|                  |                                                         | Brennnessel- Tee             |            |        |                              |                   |                | streng         | cattle                  | int (oral)      | 0.43 |      | ew  | 595 | 58 |
